# Supplementary material for: Maintenance of Type IV Secretion Function During Helicobacter pylori Infection in Mice
Source: PubMed Central journal article supplement (PMC8534286; doi:10.1128/mbio.03147-20), 2020-12-22

FIGURE S1

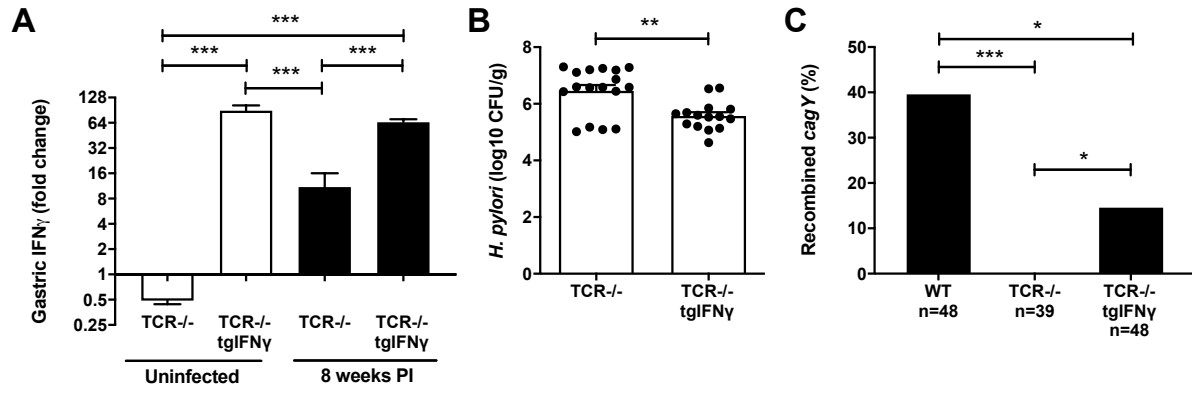

Supplement: mbio03147-20-sf001.pdf [file mbio03147-20-sf001.pdf]
